# Supplementary material
Source: Springer Nature journal article supplement (https://www.springermedizin.de/resource/supplementary/13058_2004_1024_MOESM5_ESM.pdf/9698166)
Supplement: MOESM5 [file 9698166]

Mid Spine

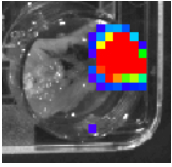

Left Skull

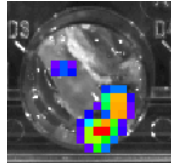

Left Dorsal Rib

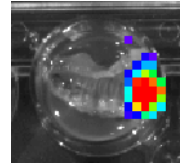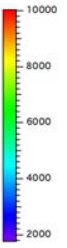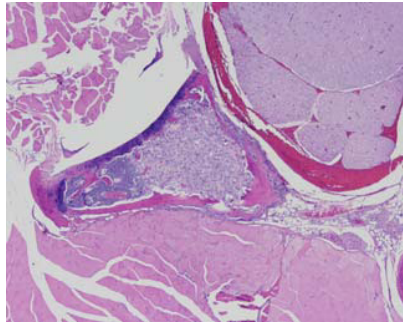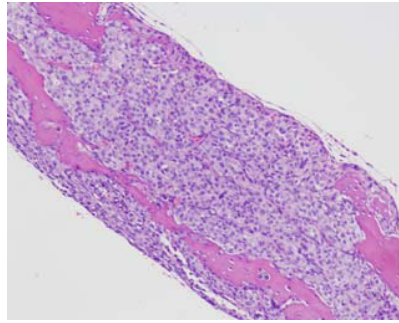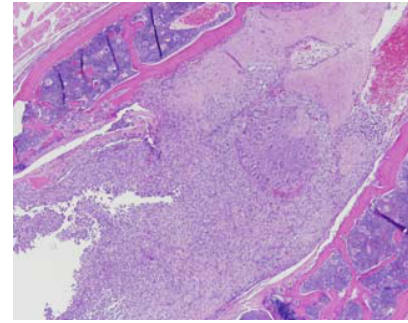

Mid Spine 40x

Metastases in vertebral body (shown) and in spinal canal

Left Skull 100x

Metastasis in medullary cavity of bone

Left Dorsal Rib 40x

Metastasis in vertebral canal

Left Leg

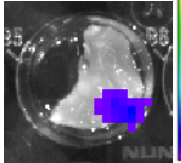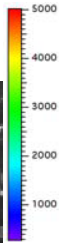

Right Leg

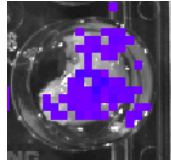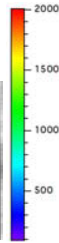

Brain

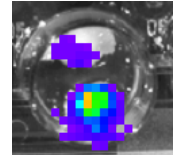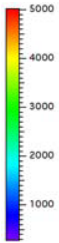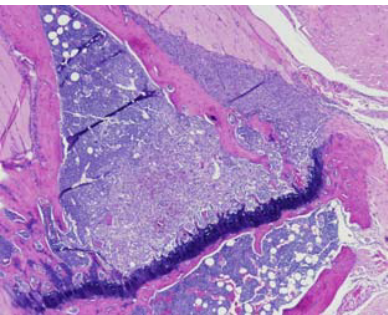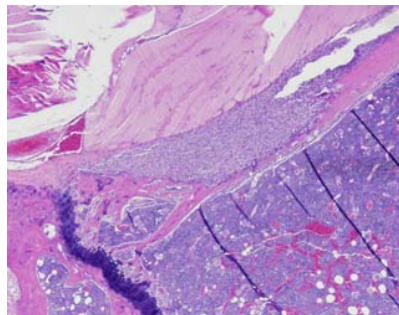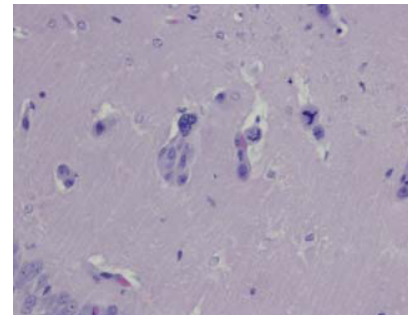

Left Leg 40x

Micrometastasis in tibia near growth plate

Right Leg 40x

Micrometastasis in periosteal region near head of tibia

Brain 200x

Micrometastases associated with vessels in hippocampus
